# Supplementary material for: Receptor Activity-modifying Protein-directed G Protein Signaling Specificity for the Calcitonin Gene-related Peptide Family of Receptors
Source: PubMed Central journal article supplement (PMC5063977; doi:10.1074/jbc.m116.751362), 2016-08-26
Supplement: 10.1074_M116.751362_jbc.M116.751362-1.pdf [file 10.1074_M116.751362_jbc.M116.751362-1.pdf]

**Supplementary Movie 1.**

The RAMP2 C-terminus (yellow surface, right hand side) approaches toward  $G\alpha_s$  (green surface, left hand side) during a molecular dynamics simulations of an active RAMP2-GCGR-glucagon- $G\alpha_s$  complex. The GCGR (ribbon representation) is coloured according to time progression, from red (0 ns) to blue (500 ns).

**Supplementary Movie 2.**

The RAMP1 C-terminus (yellow surface, right hand side) approaches toward  $G\alpha_s$  (blue surface, left hand side) during a 500 ns molecular dynamics simulations of an active RAMP1-CLR-CGRP- $G\alpha_s$  complex. CLR (ribbon representation) is coloured green. Part of the RAMP C-terminus also contacts H8 of CLR.
